# Supplementary material for: The miR151 and miR5100 Transfected Bone Marrow Stromal Cells Increase Myoblast Fusion in IGFBP2 Dependent Manner
Source: PubMed Central journal article supplement (PMC9391248; doi:10.1007/s12015-022-10350-y), 2022-02-21

Figure S1

A

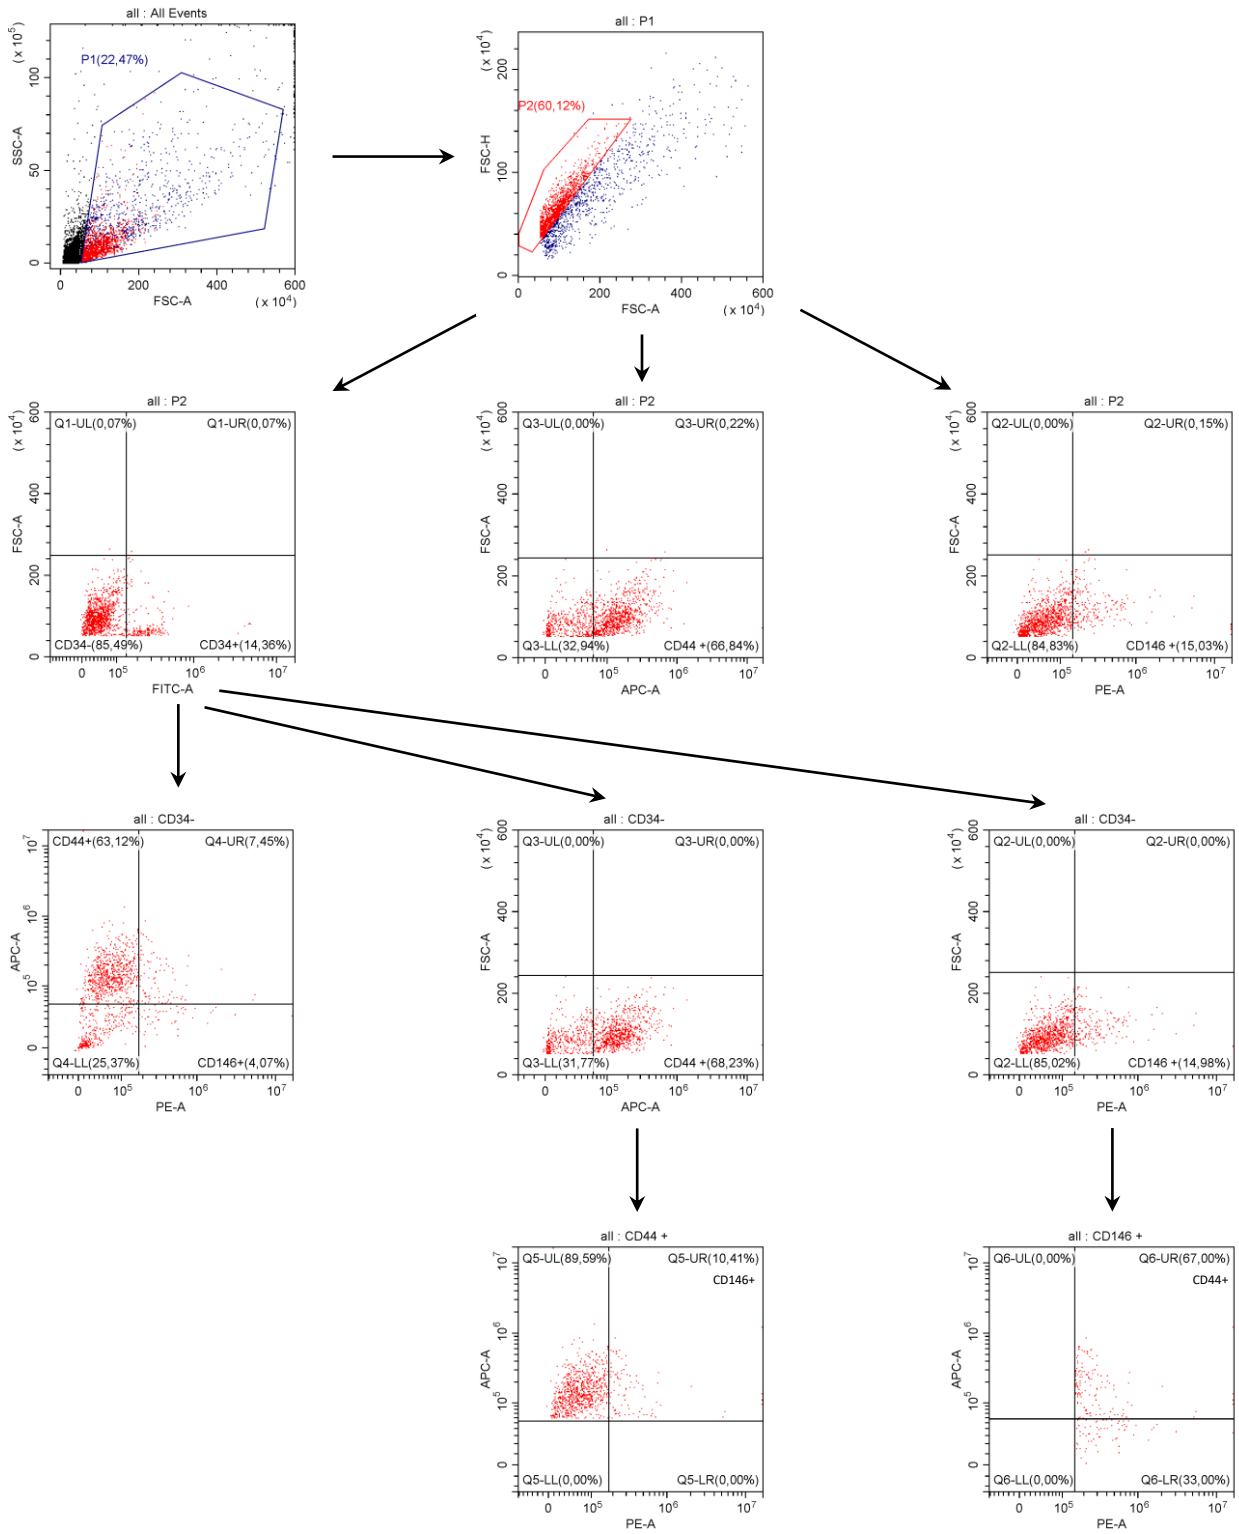

Supplement: 12015_2022_10350_MOESM1_ESM.pdf [file 12015_2022_10350_MOESM1_ESM.pdf]
